# Supplementary material for: Observational Cross-Sectional Study on Mediterranean Diet and Sperm Parameters
Source: MDPI journal article supplement (doi:10.3390/nu15234989), 2023-12-01
Supplement: s1 [file s1]

## Supplemental Table S1

Correlation analysis between MEDAS Score and semen parameters, in 300 study participants, corrected for subjects age, body mass index and smoking status. Values in bold are significative.

| Parameters                 |         |                   |
|----------------------------|---------|-------------------|
| Semen Volume               | R       | 0.151             |
|                            | P value | <b>0.009</b>      |
| Semen pH                   | R       | -0.036            |
|                            | P value | 0.538             |
| Sperm Concentration        | R       | 0.483             |
|                            | P value | <b>&lt;0.0001</b> |
| Total Sperm Count          | R       | 0.545             |
|                            | P value | <b>&lt;0.0001</b> |
| Sperm Progressive Motility | R       | 0.524             |
|                            | P value | <b>&lt;0.0001</b> |
| Non-Motile Sperm           | R       | -0.500            |
|                            | P value | <b>&lt;0.0001</b> |
| Sperm Viability            | R       | 0.425             |
|                            | P value | <b>&lt;0.0001</b> |
| Typical Sperm Morphology   | R       | 0.538             |
|                            | P value | <b>&lt;0.0001</b> |

## MEDAS Questionnaire

| Questions                                                                                                      | Answers                      |
|----------------------------------------------------------------------------------------------------------------|------------------------------|
| 1) Is olive oil the main culinary fat used?                                                                    | Yes = 1 point / No = 0 point |
| 2) Are $\geq 4$ tablespoons of olive oil used each day?                                                        | Yes = 1 point / No = 0 point |
| 3) Are $\geq 2$ servings (of 200 g each) of vegetables eaten each day?                                         | Yes = 1 point / No = 0 point |
| 4) Are $\geq 3$ servings of fruit (of 80 g each) eaten each day?                                               | Yes = 1 point / No = 0 point |
| 5) Is $< 1$ serving (100–150 g) of red meat/hamburgers/other meat products eaten each day?                     | Yes = 1 point / No = 0 point |
| 6) Is $< 1$ serving (12 g) of butter, margarine or cream eaten each day?                                       | Yes = 1 point / No = 0 point |
| 7) Is $< 1$ serving (330 mL) of sweet or sugar sweetened carbonated beverages consumed each day?               | Yes = 1 point / No = 0 point |
| 8) Are $\geq 3$ glasses (of 125 mL) of wine consumed each week?                                                | Yes = 1 point / No = 0 point |
| 9) Are $\geq 3$ servings (of 150 g) of legumes consumed each week?                                             | Yes = 1 point / No = 0 point |
| 10) Are $\geq 3$ servings of fish (100–150 g) or seafood (200 g) eaten each week?                              | Yes = 1 point / No = 0 point |
| 11) Is $< 3$ servings of commercial sweets/pastries eaten each week?                                           | Yes = 1 point / No = 0 point |
| 12) Is $\geq 1$ serving (of 30 g) of nuts consumed each week?                                                  | Yes = 1 point / No = 0 point |
| 13) Is chicken, turkey, or rabbit routinely eaten instead of veal, pork, hamburger, or sausage?                | Yes = 1 point / No = 0 point |
| 14) Are pasta, vegetable or rice dishes flavored with garlic, tomato, leek or onion eaten $\geq$ twice a week? | Yes = 1 point / No = 0 point |
